# Supplementary material for: In Vitro Effectiveness of Soft Contact Lens Solutions Available on the Dutch Market against Acanthamoeba Species
Source: MDPI journal article supplement (doi:10.3390/pathogens12020214), 2023-01-29
Supplement: s1 [file s1]

**Table S1.** Selected contact lens solutions and their ingredients.

| Code   | Product name                                                  | Manufacturer           | Active ingredient<br>(% w/v)                    | Surfactant                    | Buffer                                                     | EDTA   | Other                                                                        | MMRDT<br>(hours) |
|--------|---------------------------------------------------------------|------------------------|-------------------------------------------------|-------------------------------|------------------------------------------------------------|--------|------------------------------------------------------------------------------|------------------|
| MPS 1  | Albert Heijn<br>All-in-one                                    | Melleson<br>Pharma BV  | PHMB 0.0001                                     |                               |                                                            | 0.01%  | Isotonic<br>increasing<br>ingredients                                        | 4                |
| MPS 2  | HEMA no-rub solution<br>for monthly soft lenses               | Ridam Care             | PHMB 0.0002                                     | Pluronic                      | Borax, boric<br>acid                                       | 0.01%  |                                                                              | 6                |
| MPS 3  | Kruidvat Opticare<br>Zachte lenzen<br>All-in-One              | I-care<br>Vision BV    | PHMB 0.0004                                     | Poloxamer 407                 | Borax, boric<br>acid                                       | 0.01%  |                                                                              | 4                |
| MPS 4  | Eyewish Eyexpert<br>Easycare                                  | Cooper Vision          | PHMB 0.0001                                     | Poloxamer 188                 | Phosphate                                                  | 0.01%  |                                                                              | 4                |
| MPS 5  | Specsavers easyvision<br>easypurpose<br>multipurpose solution | Cooper Vision          | PHMB 0.00013                                    | Poloxamer                     | Phosphate                                                  | % n.a. | Hyaluronate<br>0.01%                                                         | 4                |
| MPS 6  | Ote Sensation<br>All-in-one                                   | Oté Pharma Sol<br>BV   | PHMB,<br>polyquaternium                         |                               |                                                            |        | Hyaluronate                                                                  | 6                |
| MPS 7  | ClearVision                                                   | Oté Pharma Sol<br>BV   | PHMB 0.0001                                     | Poloxamine 1%                 |                                                            |        | Hyaluronate,<br>provitamin B5                                                | 4                |
| MPS 8  | Acuvue Revitalens                                             | Johnson &<br>Johnson   | Polyquaternium<br>0.0003, Alexidine<br>0.00016  | Tetronic 904                  | Borax, boric<br>acid,<br>trisodium<br>citrate<br>dihydrate | % n.a. | Sodium<br>chloride                                                           | 6                |
| MPS 9  | OptiFree PureMoist                                            | Alcon<br>Laboratories  | Polyquad 0.001,<br>Aldox 0.0006                 | Tetronic 1304<br>(poloxamine) | Boric acid,<br>sodium<br>citrate                           | 0.01%  | Hydra-Glyde<br>(EOBO-41),<br>sodium<br>chloride                              | 6                |
| MPS 10 | Solocare Aqua                                                 | Menicon                | Polyhexanide<br>0.0001                          | Poloxamer 407                 | Sodium<br>phosphate                                        | % n.a. | Sorbitol,<br>provitamin B5,<br>tromethamin,<br>lens case with<br>silver ions | 5 minutes        |
| MPS 11 | Regard                                                        | Vita Research          | Chlorite,<br>hydrogen<br>peroxide 0.01          | Poloxamine,<br>Pluronic F-68  | Boric acid                                                 |        | HPMC 0.15%                                                                   | 6                |
| MPS 12 | Biotrue                                                       | Bausch &<br>Lomb       | PAPB 0.00013,<br>Polyquad 0.0001                | Poloxamine                    | Boric acid,<br>sodium<br>borate                            | % n.a. | Hyaluronate,<br>sulfobetaine,<br>sodium<br>chloride                          | 4                |
| MPS 13 | Pearl iWear<br>Multibalance All-in-1                          | Avizor S.A.            | PHMB 0.0002                                     | Poloxamer                     |                                                            | 0.01%  | Allantoine,<br>hyaluronate                                                   | 4                |
| PIS    | Cleadow                                                       | Ophtecs<br>Corporation | Povidone iodine<br>4.0mg/tablet,<br>H2O2 40 ppm |                               | Boric acid,<br>ascorbic<br>acid                            | % n.a. |                                                                              | 4                |
| HPS 1  | Easysept                                                      | Bausch &<br>Lomb       | H2O2 3.0                                        |                               | Phosphoric<br>acid,<br>phosphate                           |        | Sodium<br>chloride                                                           | 6                |
| HPS 2  | Avizor Everclean                                              | Avizor S.A.            | H2O2 3.0                                        |                               |                                                            |        |                                                                              | 2                |

\* Abbreviations: EDTA = ethylenediaminetetraacetic acid, H2O2 = hydrogen peroxide, HPMC = hydroxypropylmethylcellulose, HPS = hydrogen peroxide solution, MMRDT = manufacturer's minimum recommended disinfection time, MPS = multipurpose solution, PAPB = polyaminopropyl biguanide, PHMB = polyhexamethylene biguanide, PIS = povidone iodine solution, n.a. = not available.
